# Supplementary material
Source: PubMed Central journal article supplement (PMC3250687)
Supplement: mmc1.pdf [file mmc1.pdf]

# **Distribution of Sialic Acids on Mucins and Gels: A Defense Mechanism**

S. C. Baos,<sup>†‡</sup> D. B. Phillips,<sup>‡</sup> L. Wildling,<sup>§</sup> T. J. McMaster,<sup>‡</sup> and M. Berry<sup>†‡</sup>

<sup>†</sup>Academic Unit of Ophthalmology, Bristol Eye Hospital, and <sup>‡</sup>H. H. Wills Physics Laboratory, University of Bristol, Bristol, United Kingdom; and <sup>§</sup>Institute of Biophysics, University of Linz, Linz, Austria

## SUPPORTING MATERIAL

### FIGURE LEGEND

- S1. (A) A set of typical force curves, all at the same scale, showing single interaction peaks in the (inverted) force-extension domain. Only curves showing such a single interaction event were analysed.  
(B) A number distribution of all analysed force curves showing the distribution of rupture distances, confirming the modal separation at a distance consistent with PEG-lectin dimensions.
- S2. A comparison of 10,000 (A), 100,000 (B) and 1,000,000 (C) randomly-generated datasets of the same number of interaction events for an example acquired force-volume data set from an impression sample, showing that there is no improvement in resolution or precision in increasing the number of datasets beyond 10,000.
- S3. Single energy barrier fit for the MAA- and SNA-functionalised tips, (a) and (b) respectively, showing the higher values of sum of least squares compared with two regime and Tees model fits.
- S4. Force spectroscopy data on MAA (as contrasted with force volume data on the same system), performed over a lower loading rate regime, and yielding a lower dissociation constant of  $0.17 \pm 0.06 \text{ s}^{-1}$ .

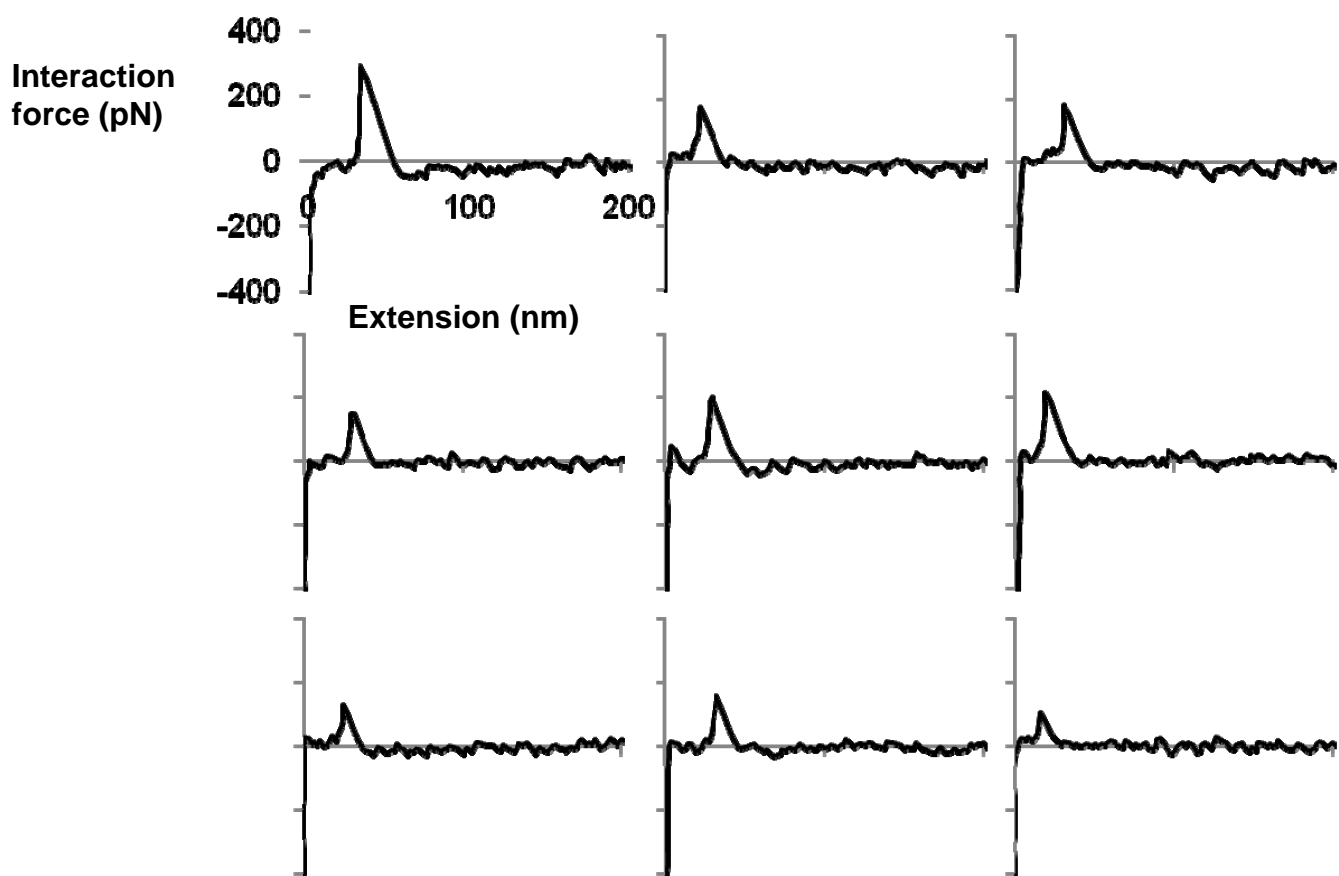

Figure S1 A

1  
2  
3

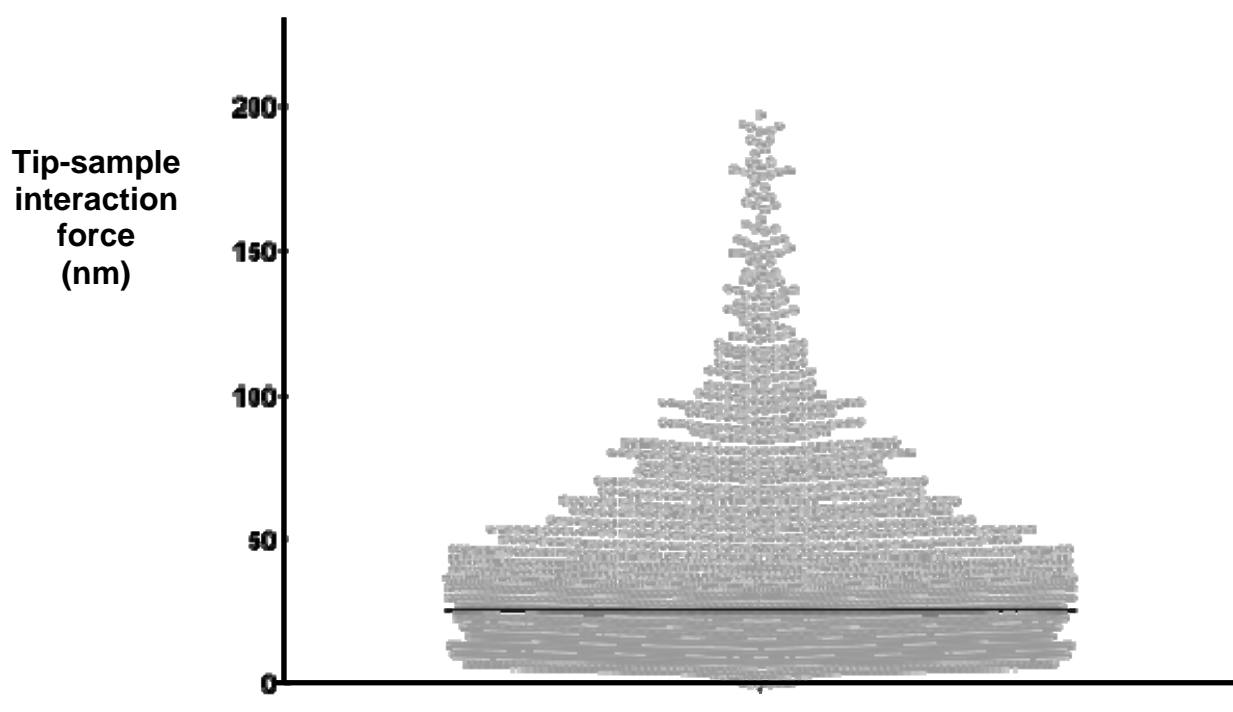

4  
5  
6  
7  
8

Figure S1 B

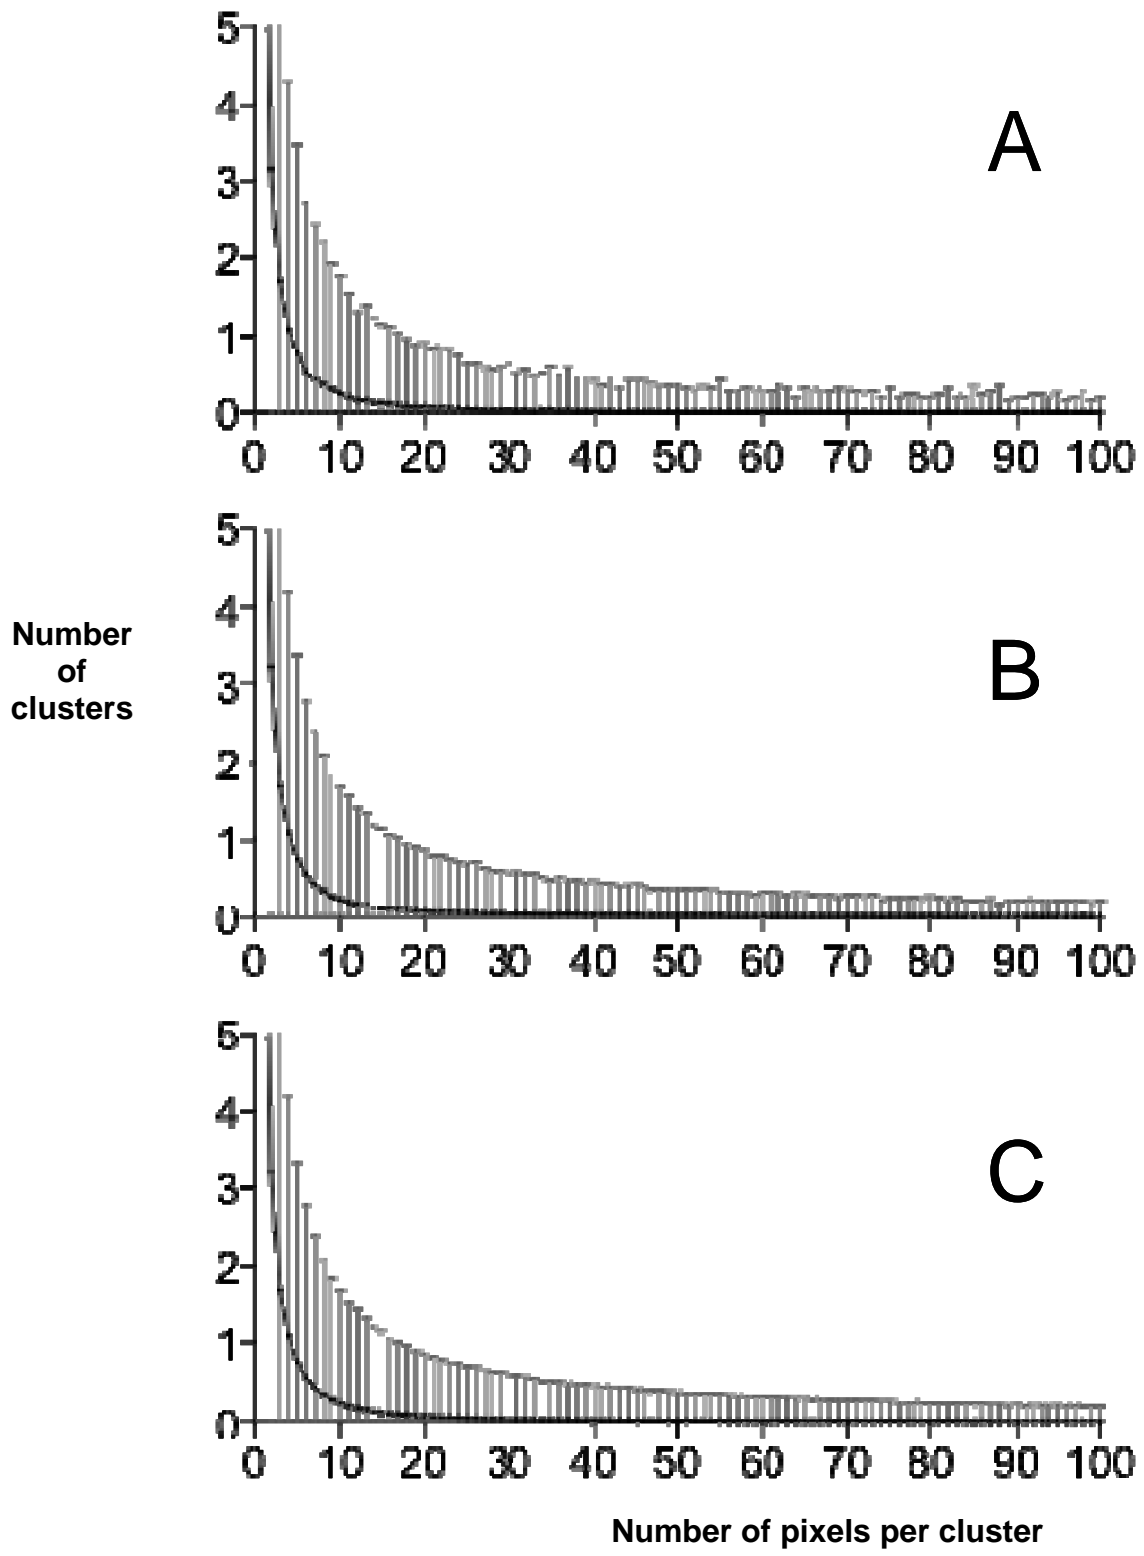

9  
10 Figure S2

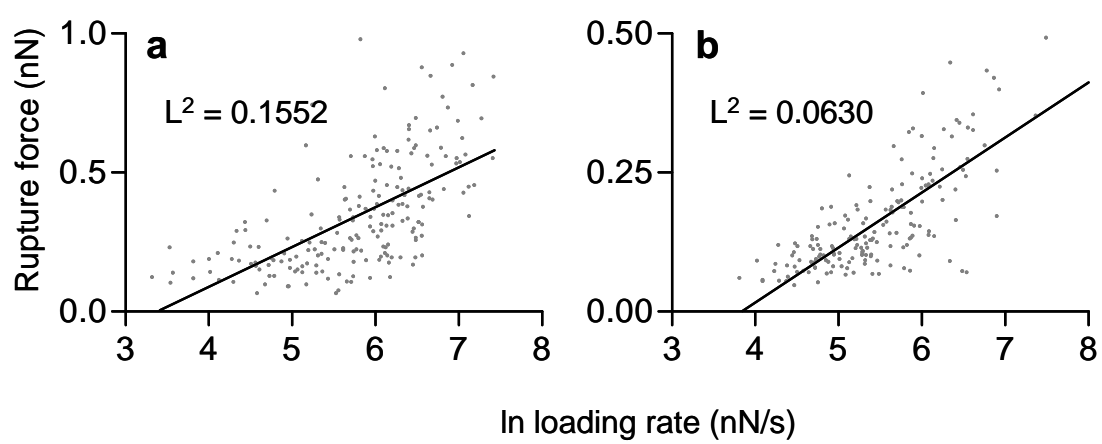

11  
12 Figure S3  
13  
14  
15  
16

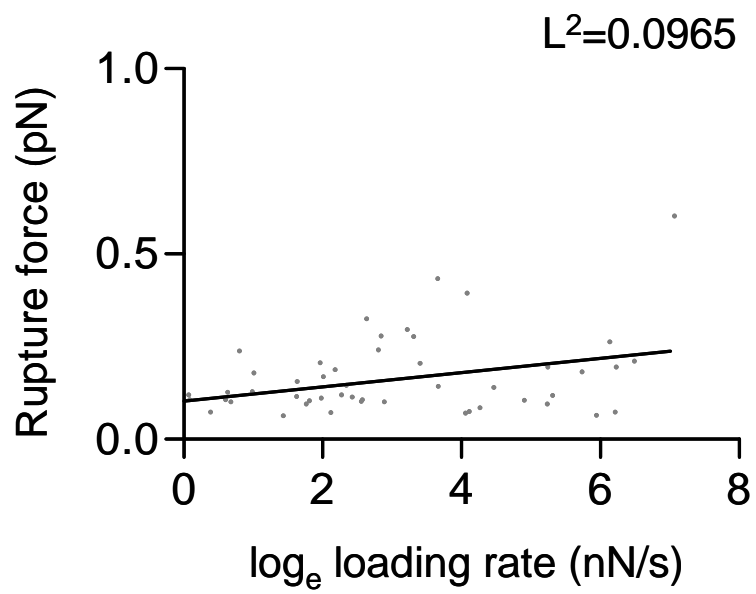

17  
18 Figure S4  
19  
20
